# Supplementary material for: Longitudinal observations of progressive cardiac dysfunction in a cardiomyopathic animal model by self-gated cine imaging based on 11.7-T magnetic resonance imaging
Source: PubMed Central journal article supplement (PMC5567262; doi:10.1038/s41598-017-09755-4), 2017-08-22
Supplement: 41598_2017_9755_MOESM1_ESM.pdf [file 41598_2017_9755_MOESM1_ESM.pdf]

# **Longitudinal observations of progressive cardiac dysfunction in a cardiomyopathic animal model by self-gated cine imaging based on 11.7-T magnetic resonance imaging**

**Shigeyoshi Saito PhD<sup>1,2\*</sup>, Minori Tanoue BSc<sup>1</sup>, Kasumi Masuda PhD<sup>3</sup>, Yuki Mori PhD<sup>2,4</sup>, Satoshi Nakatani MD, PhD<sup>3</sup>, Yoshichika Yoshioka PhD<sup>2,4</sup>, Kenya Murase PhD<sup>1,2</sup>**

<sup>1</sup> Department of Medical Physics and Engineering, Division of Health Sciences, Osaka University Graduate School of Medicine, Suita, Osaka, Japan, 560-0871

<sup>2</sup> Center for Information and Neural Networks (CiNet), National Institute of Information and Communications Technology, and Osaka University, Suita, Osaka, Japan, 560-0871

<sup>3</sup> Department of Functional Diagnostics, Division of Health Sciences, Osaka University Graduate School of Medicine, Suita, Osaka, Japan 560-0871

<sup>4</sup> Biofunctional Imaging Laboratory, Immunology Frontier Research Center (IFReC), Osaka University, Suita, Osaka, Japan, 560-0871

**Supplemental files (6 files)**

**Supplementary 1**

**J2N\_k\_20weeks.avi**

Typical movie of a 4-chamber view obtained using magnetic resonance imaging for a  
J2N\_k hamster

### **Supplementary 2**

**J2N\_n\_20weeks.avi**

Typical movie of a 4-chamber view obtained using magnetic resonance imaging for a  
J2N\_n hamster

### **Supplementary 3**

**K\_Mpeg.wmv**

Typical movie of an SA view obtained using b-mode echocardiography for a J2N\_k  
hamster

### **Supplementary 4**

**N\_Mpeg.wmv**

Typical movie of an SA view obtained using b-mode echocardiography for a J2N\_n  
hamster

## **Supplementary 5**

**k\_SA.avi**

Typical movie of an SA view obtained using magnetic resonance imaging for a J2N\_k  
hamster

## **Supplementary 6**

**n\_SA.avi**

Typical movie of an SA view obtained using magnetic resonance imaging for a J2N\_n  
hamster
